# Supplementary material for: Joint Diagnostic Approach to Pressure and Tracer Responses from Reservoirs: An Experimental and Theoretical Study to Estimate the Accuracy of Reservoir Models
Source: Hindawi journal article supplement (doi:10.1155/2024/9329314), 2024-04-13
Supplement: f1 [file 9329314.f1.pdf]

Supplementary photos of the experimental apparatus  
regarding

Joint diagnostic approach to pressure and tracer responses from reservoirs:  
An experimental and theoretical study to estimate the accuracy of reservoir models

by

Mitsuo Matsumoto and Kazuki Sawayama

# Experimental apparatus

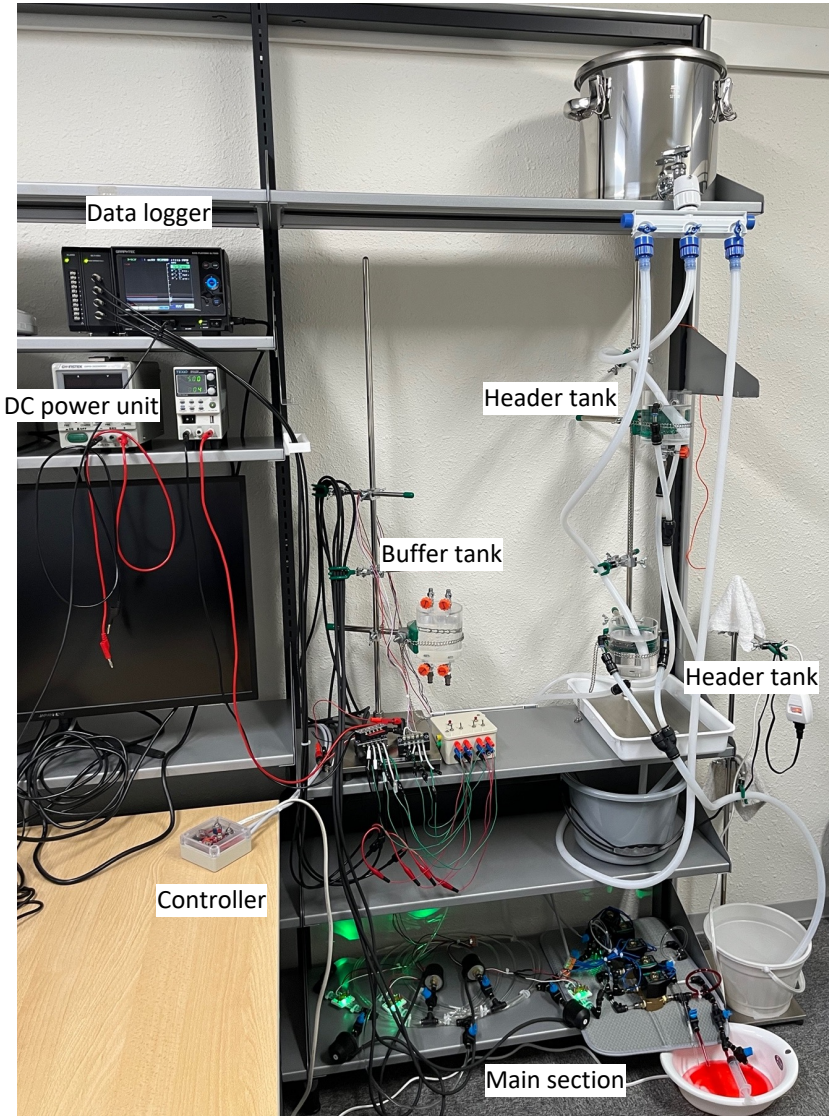

General view

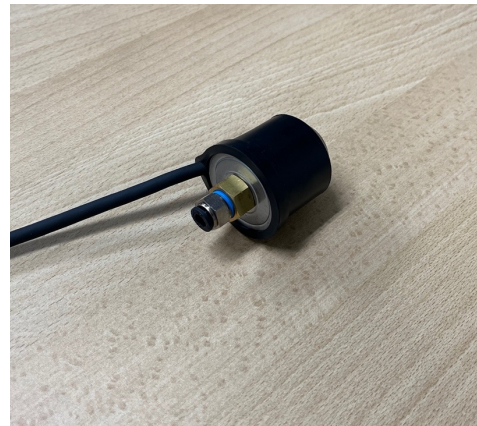

Pressure sensor

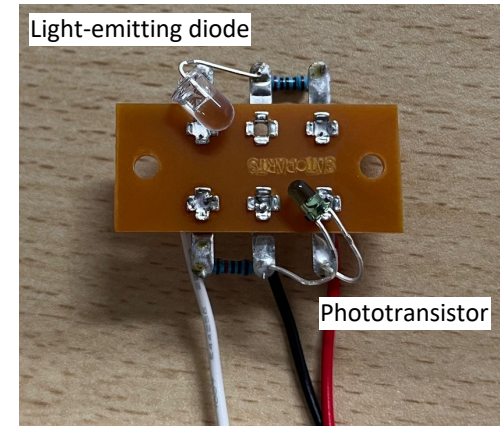

Concentration sensor

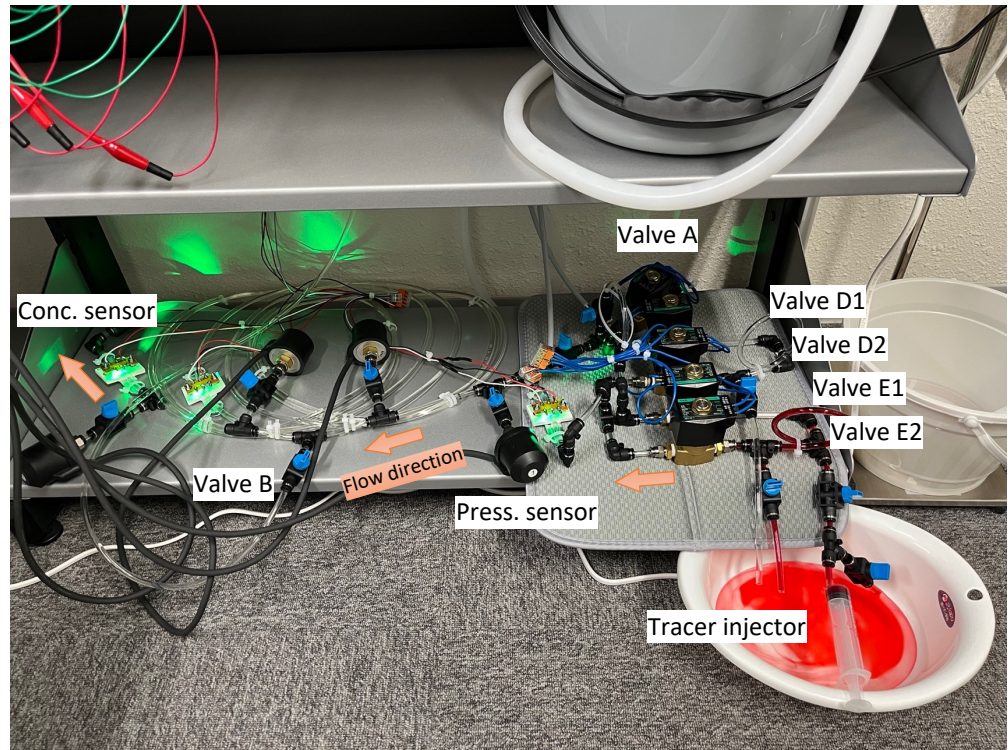

Main section
